# Supplementary material
Source: PubMed Central journal article supplement (PMC6166863)
Supplement: NIHMS79118-supplement-Reporting_Summary.pdf [file NIHMS79118-supplement-Reporting_Summary.pdf]

## Reporting Summary

Nature Research wishes to improve the reproducibility of the work that we publish. This form provides structure for consistency and transparency in reporting. For further information on Nature Research policies, see [Authors & Referees](#) and the [Editorial Policy Checklist](#).

### Statistical parameters

When statistical analyses are reported, confirm that the following items are present in the relevant location (e.g. figure legend, table legend, main text, or Methods section).

n/a | Confirmed

- The exact sample size ( $n$ ) for each experimental group/condition, given as a discrete number and unit of measurement
- An indication of whether measurements were taken from distinct samples or whether the same sample was measured repeatedly
- The statistical test(s) used AND whether they are one- or two-sided  
*Only common tests should be described solely by name; describe more complex techniques in the Methods section.*
- A description of all covariates tested
- A description of any assumptions or corrections, such as tests of normality and adjustment for multiple comparisons
- A full description of the statistics including central tendency (e.g. means) or other basic estimates (e.g. regression coefficient) AND variation (e.g. standard deviation) or associated estimates of uncertainty (e.g. confidence intervals)
- For null hypothesis testing, the test statistic (e.g.  $F$ ,  $t$ ,  $r$ ) with confidence intervals, effect sizes, degrees of freedom and  $P$  value noted  
*Give  $P$  values as exact values whenever suitable.*
- For Bayesian analysis, information on the choice of priors and Markov chain Monte Carlo settings
- For hierarchical and complex designs, identification of the appropriate level for tests and full reporting of outcomes
- Estimates of effect sizes (e.g. Cohen's  $d$ , Pearson's  $r$ ), indicating how they were calculated
- Clearly defined error bars  
*State explicitly what error bars represent (e.g. SD, SE, CI)*

*Our web collection on [statistics for biologists](#) may be useful.*

### Software and code

Policy information about [availability of computer code](#)

Data collection

N.A.

Data analysis

Flow Cytometry data analysis was performed using FlowJo software (Tree Star, version 10)  
For qualified cluster analysis we used String ([www.String-db.org](http://www.String-db.org))  
Clustering of differentially expressed genes was visualized using Cytoscape 3.5.0 software  
Statistical analysis between groups was performed with GraphPad Prism 5 and 7  
Differential expression analysis was done using EdgeR 3.14.2 and Limma 3.28.1  
In data analysis MS Excel was also used

For manuscripts utilizing custom algorithms or software that are central to the research but not yet described in published literature, software must be made available to editors/reviewers upon request. We strongly encourage code deposition in a community repository (e.g. GitHub). See the Nature Research [guidelines for submitting code & software](#) for further information.

## Data

Policy information about [availability of data](#)

All manuscripts must include a [data availability statement](#). This statement should provide the following information, where applicable:

- Accession codes, unique identifiers, or web links for publicly available datasets
- A list of figures that have associated raw data
- A description of any restrictions on data availability

The data that support the findings of this study are available from the corresponding author upon request. The accession codes are: SRX4548789, SRX4548788, SRX4548787, SRX4548786, SRX4548785, SRX4548784, SRX4548783, SRX4548782, SRX4548781

## Field-specific reporting

Please select the best fit for your research. If you are not sure, read the appropriate sections before making your selection.

Life sciences  Behavioural & social sciences  Ecological, evolutionary & environmental sciences

For a reference copy of the document with all sections, see [nature.com/authors/policies/ReportingSummary-flat.pdf](https://www.nature.com/authors/policies/ReportingSummary-flat.pdf)

## Life sciences study design

All studies must disclose on these points even when the disclosure is negative.

|                 |                                                                                                                                                                                                                                                                                                                                                                                                                                                              |
|-----------------|--------------------------------------------------------------------------------------------------------------------------------------------------------------------------------------------------------------------------------------------------------------------------------------------------------------------------------------------------------------------------------------------------------------------------------------------------------------|
| Sample size     | Sample size was determined by power analysis based on pilot experiments and previous findings ( Zafirova et. al.,Immunity 2009.)                                                                                                                                                                                                                                                                                                                             |
| Data exclusions | No data was excluded                                                                                                                                                                                                                                                                                                                                                                                                                                         |
| Replication     | All data was successfully replicated at least two times. How many times each experiment was performed and which statistical analysis was used is indicated in the figure legends.                                                                                                                                                                                                                                                                            |
| Randomization   | Mice were age and sex matched. Mice were allocated to groups by an independent animal caretaker.                                                                                                                                                                                                                                                                                                                                                             |
| Blinding        | In our experiments we used mostly genetically modified mice which were genotyped before start of each experiment to determine appropriate number of animals per group to ensure statistical power of results for each experiment. However, individual mice and from them derived samples were numbered regardless of genotype, which finally allowed blind analysis of samples though. The samples were matched with their genotype only after the analysis. |

## Reporting for specific materials, systems and methods

### Materials & experimental systems

| n/a                                 | Involvement                                                     |
|-------------------------------------|-----------------------------------------------------------------|
| <input checked="" type="checkbox"/> | <input type="checkbox"/> Unique biological materials            |
| <input type="checkbox"/>            | <input checked="" type="checkbox"/> Antibodies                  |
| <input type="checkbox"/>            | <input checked="" type="checkbox"/> Eukaryotic cell lines       |
| <input checked="" type="checkbox"/> | <input type="checkbox"/> Palaeontology                          |
| <input type="checkbox"/>            | <input checked="" type="checkbox"/> Animals and other organisms |
| <input checked="" type="checkbox"/> | <input type="checkbox"/> Human research participants            |

### Methods

| n/a                                 | Involvement                                        |
|-------------------------------------|----------------------------------------------------|
| <input checked="" type="checkbox"/> | <input type="checkbox"/> ChIP-seq                  |
| <input type="checkbox"/>            | <input checked="" type="checkbox"/> Flow cytometry |
| <input checked="" type="checkbox"/> | <input type="checkbox"/> MRI-based neuroimaging    |

## Antibodies

Antibodies used

Flow Cytometry:  
 Name / Clone name / Catalog no. / (most used) Lot no. / dilution factor / manufacturer  
 CD3e/145-2C11/ 45003182/4304569/1:300/eBioscience  
 NK1.1/PK136/45594182/14331619/1:400/eBioscience  
 CD49b/DX5/13597183/E03102-1631/1:100/eBioscience  
 FNY/XMG1.2/17731182/4332526/1:200/eBioscience  
 TNF $\alpha$  /MP6-XT22/11732181/1927449/1:100/eBioscience  
 IL-6/8C9 /21670064/LO144/1:100/Immuno tools  
 GM-CSF/MP1-22E9/12-7331-41/E031118/1:100/eBioscience

NKG2D (CD314)/CX5/25-5882-82/4275095/1:50/eBioscience  
 CD247 (CD3 $\zeta$ )/6B10.2/12-2479-80/4291757/1:50/eBioscience  
 ZAP-70/1E7.2/11-6695-82/4308883/1:400/eBioscience  
 CD122 /TM-b1/17-1222-80/E004801633/1:100/eBioscience  
 CD11b/M1/70/ 25011281/4289817/1:400/eBioscience  
 c-kit (CD117)/ACK2/11-1171-82/E004741631/1:100/eBioscience  
 Fc $\epsilon$ R1 $\gamma$  /1D6/M191-3/ 1:100/MBL  
 CD247 (CD3 $\zeta$ )/H146-968/ ab91493/6R3198401-1/1:100/ Abcam.  
 Ly49H (3D10) and Ly49D (4e4) were kind gift from W. Yokoyama (Washington University in St. Louis, USA)/1:100  
 CD34 /RAM34/14-0341-81/E02497-1631/1:100/eBioscience  
 Flt3L /A2F10.1/17-1351-80/E02731-1633/1:100/eBioscience  
 CD127 /A7R34/14-1271-82/E014711633/1:100/eBioscience  
 CD16/32 /93/14-0161-81/E06356-1631/1:100/eBioscience  
 Sca1/D7/17598181/E073531635/1:100/eBioscience  
 pSyk(Y348)/moch1ct/12901442/4325047  
 pPLCy(Y786M9S/14008/1:400/Cell Signaling  
 Sla/rabbit polyclonal/PA5-22356/TA2506553/1:50/Invitrogen  
 Fusion proteins (NCR1-Fc, NKG2D-Fc and hPVR-Fc) were produced by our in-house facility and used 10 $\mu$ g/sample

#### Western blot:

Name / Clone name / Catalog no. / (most used) Lot no. / dilution factor / manufacturer  
 Syk/D3Z1E/3198/2/1:1000/Cell signaling  
 FcR1 $\gamma$ /rabbit polyclonal/06-727/2882662/1:500/ Merckmillipore  
 Zap70/99F2/2705/10/1:500/Cell signaling  
 CD3 $\zeta$ /rabbit polyclonal/SAB4503580/210468/1:500/Sigma  
 Akt /11E7/4685/6/1:80000/Cell signaling  
 $\beta$ -actin/C4/MAB/2665057/1:80000/Santa Cruz

#### Validation

Validation of purchased antibodies was done by the suppliers. Data on the validation of in-house generated reagents (fusion proteins), has been provided in the supplementary figures.

## Eukaryotic cell lines

### Policy information about [cell lines](#)

#### Cell line source(s)

The B16-F10 cell line was purchased from ATCC (CRL-6475)

#### Authentication

Authentication was provided by ATCC

#### Mycoplasma contamination

The cell line was confirmed to be negative for mycoplasma contamination by PCR.

#### Commonly misidentified lines (See [ICLAC](#) register)

No commonly misidentified cell lines were used.

## Animals and other organisms

### Policy information about [studies involving animals](#); [ARRIVE guidelines](#) recommended for reporting animal research

#### Laboratory animals

Mice used in experiments were 6-12 weeks old. Both male and female mice were used but they were strictly age- and sex-matched within experiments.  
 Klrk1<sup>-/-</sup> Zafirova et al., 2009.  
 Klrk1<sup>flox/flox</sup> Lenartić et al., 2017.  
 Klrk1 $\Delta/\Delta$  Zafirova et al., 2011.  
 NCR1<sup>gfp/gfp</sup> Gazit et al., 2006.  
 IFN $\gamma$ <sup>-/-</sup> Jackson Laboratories(2287)  
 C57BL/6 Jackson Laboratories (B6; strain 664)  
 Hcst<sup>-/-</sup> Laboratory of M. Colonna  
 Tyrobp<sup>-/-</sup> Laboratory of M. Colonna  
 Rag1<sup>cre/+</sup> Laboratory of M. Busslinger  
 Rosa26<sup>-foxed</sup> STOP YFP Laboratory of Ari Waisman  
 NCR1<sup>cre</sup> Laboratory of V. Sexl  
 CD4<sup>cre</sup> Laboratory of D. Littman  
 CD3 $\zeta$ <sup>-/-</sup> CNRS, Orleans (B6-Cd3z tm1Mal)  
 Deleter-cre (B6.C-Tg(CMV-cre)1Cgn/J) Jackson Laboratories (6054)  
 Balb/c Jackson Laboratories (strain 00651)  
 Sla<sup>-/-</sup> Laboratory of Jane McGlade4)

#### Wild animals

Study did not involve wild animals

#### Field-collected samples

Study did not involve samples collected from the field

## Plots

Confirm that:

- The axis labels state the marker and fluorochrome used (e.g. CD4-FITC).
- The axis scales are clearly visible. Include numbers along axes only for bottom left plot of group (a 'group' is an analysis of identical markers).
- All plots are contour plots with outliers or pseudocolor plots.
- A numerical value for number of cells or percentage (with statistics) is provided.

## Methodology

Sample preparation

Samples were prepared as described in the methods section. Briefly, animals were sacrificed according to European guidelines and spleens and bone marrow were removed. Single cell suspensions were generated by mashing organs through a 70µm sieve (spleen) or by smashing bones with a mortar, after which suspensions were run through a sieve. Erythrocytes were lysed using a hypotonic solution. Before staining with specific antibodies, cells were pretreated with Fc block (clone 2.4G2, produced in-house). To-pro3 (life Technologies) or Fixable Viability Dye (eBioscience) was used to exclude dead cells.

Instrument

BD FACS ARIA and BD FACS VERSE

Software

FlowJo software (Tree Star, version 10)

Cell population abundance

After sorting we purity was determined to be 97-99%.

Gating strategy

pecific gating strategies are specified in the figure legends and/or methods section. Briefly, doublets were excluded using FSC-H vs. FSC-A gating, followed by SSC-H vs. SSC-A gating. Dead cells were excluded by viability dye. Based on FSC/SSC properties gating for lymphocytes was performed. Next, markers for specific cell populations were used to define populations. In most experiments, murine NK cells were investigated, which were defined as CD3-NK1.1+ or CD3-NKp46+, depending on the experiment and/or genotype of the mice under investigation. For cytokine production or for specific marker expression, positive gates were set based on isotype control, FMO, or on cells genetically deficient for the specified marker (e.g. NKG2D, NCR1, CD3zeta). For analysis of haematopoietic precursors in the bone marrow, a lineage channel was used, as well as specific markers to define precursor populations.

- Tick this box to confirm that a figure exemplifying the gating strategy is provided in the Supplementary Information.
